# Supplementary material for: Gestational Diabetes Mellitus Is Associated with Differences in Human Milk Hormone and Cytokine Concentrations in a Fully Breastfeeding United States Cohort
Source: MDPI journal article supplement (doi:10.3390/nu14030667), 2022-02-04
Supplement: s1 [file s1]

## SUPPLEMENTARY DATA

**Table S1.** Demographic, clinical characteristics, and human milk bioactive concentrations at baseline and 1 month postpartum according to GDM status, stratified by attendance status at 3 months postpartum, N=189

| Variables                             | No GDM (n=154)                |                          | P-value <sup>a</sup> | GDM (n=35)                   |                          | P-value <sup>a</sup> |
|---------------------------------------|-------------------------------|--------------------------|----------------------|------------------------------|--------------------------|----------------------|
|                                       | No missing month 3<br>(n=151) | Missing month 3<br>(n=3) |                      | No missing month 3<br>(n=27) | Missing month 3<br>(n=8) |                      |
| Age                                   | 31.3±4.1                      | 27.3±2.1                 | 0.10                 | 34.0±4.5                     | 35.1±3.9                 | 0.53                 |
| Ethnicity, n (%)                      |                               |                          |                      |                              |                          |                      |
| Hispanic or Latino                    | 2 (1.3)                       | 0 (0)                    | <b>0.003</b>         | 1 (3.7)                      | 0 (0)                    | 0.58                 |
| Not Hispanic or Latino                | 146 (96.7)                    | 2 (66.7)                 |                      | 26 (96.3)                    | 8 (100)                  |                      |
| Don't know/Not available              | 3 (2)                         | 1 (33.3)                 |                      | —                            | —                        |                      |
| Race, n (%)                           |                               |                          |                      |                              |                          |                      |
| White                                 | 127 (84.1)                    | 0 (0)                    | <b>&lt;0.001</b>     | 23 (85.2)                    | 1 (12.5)                 | <b>&lt;0.001</b>     |
| African American or Black             | 8 (5.3)                       | 2 (66.7)                 |                      | 1 (3.7)                      | 1 (12.5)                 |                      |
| Asian                                 | 4 (2.7)                       | 0 (0)                    |                      | 1 (3.7)                      | 6 (75.0)                 |                      |
| American Indian/Alaska<br>Native      | 3 (2.0)                       | 0 (0)                    |                      | 1 (3.7)                      | 0 (0)                    |                      |
| Other                                 | 4 (2.7)                       | 0 (0)                    |                      | 1 (3.7)                      | 0 (0)                    |                      |
| Mixed race                            | 3 (2.0)                       | 0 (0)                    |                      | —                            | —                        |                      |
| Don't know/Not available              | 2 (1.3)                       | 1 (33.3)                 |                      | —                            | —                        |                      |
| Education, %                          |                               |                          |                      |                              |                          |                      |
| High school/GED/associate's           | 28 (18.5)                     | 2 (66.7)                 | 0.09                 | 6 (22.2)                     | 2 (25.0)                 | <b>0.009</b>         |
| Bachelor's degree                     | 59 (39.1)                     | 1 (33.3)                 |                      | 15 (55.6)                    | 0 (0)                    |                      |
| Graduate degree                       | 64 (42.4)                     | 0 (0)                    |                      | 6 (22.2)                     | 6 (75.0)                 |                      |
| Baseline parity, %                    |                               |                          |                      |                              |                          |                      |
| None                                  | 71 (47.7)                     | 0 (0)                    | 0.34                 | 7 (26.9)                     | 5 (71.4)                 | 0.07                 |
| 1                                     | 51 (34.2)                     | 1 (50.0)                 |                      | 16 (61.5)                    | 1 (14.3)                 |                      |
| ≥2                                    | 27 (18.1)                     | 1 (50.0)                 |                      | 3 (11.5)                     | 1 (14.3)                 |                      |
| Gestational age at birth              | 39.8±1.1                      | 39.6±0.1                 | 0.73                 | 38.1±2.1                     | 38.6±1.3                 | 0.54                 |
| Mode of delivery, %                   |                               |                          |                      |                              |                          |                      |
| Vaginal                               | 118 (83.1)                    | 2 (100)                  | 0.52                 | 14 (53.9)                    | 2 (28.6)                 | 0.24                 |
| Cesarean                              | 24 (16.9)                     | 0 (0)                    |                      | 12 (46.2)                    | 5 (71.4)                 |                      |
| Pre-pregnancy BMI, kgm/m <sup>2</sup> | 26.4±4.6                      | 32.8±3.7                 | <b>0.02</b>          | 29.4±7.3                     | 30.5±8.1                 | 0.72                 |

|                                                    |            |           |                  |            |            |      |
|----------------------------------------------------|------------|-----------|------------------|------------|------------|------|
| 1-h 50g OGCT result (mg/dL)                        | 107.1±17.7 | 103±24    | 0.75             | 157.9±21.3 | 158.0±13.4 | 1.00 |
| Gestational weight gain of mother, kg              | 13.6±5.9   | 18.2±14.8 | 0.28             | 10.1±5.7   | 8.8±4.0    | 0.55 |
| Excessive gestational weight gain (IOM) yes, n (%) | 76 (52.1)  | 1 (50.0)  | 0.76             | 10 (37.0)  | 1 (14.3)   | 0.26 |
| Breast milk volume at month 1, mL                  | 73.9±43.1  | 24.4±8.8  | <b>0.049</b>     | 78.8±47.9  | 48.1±25.7  | 0.09 |
| Postpartum weight loss at month 1, kg              | 10.0±4.0   | 3.8±11.2  | <b>0.03</b>      | 10.4±2.4   | 10.1±2.0   | 0.79 |
| Postpartum BMI, kg/m <sup>2</sup>                  | 27.7±4.3   | 37.4±3.9  | <b>&lt;0.001</b> | 29.6±6.0   | 29.1±6.2   | 0.83 |
| Diet quality score assessed via HEI at month 1     | 65.7±8.4   | 68.3±3.8  | 0.67             | 61.8±9.9   | 63.6±14.6  | 0.74 |
| Milk glucose, mg/dL                                | 29.7±9.5   | 18.3±9.9  | <b>0.04</b>      | 27.0±11.7  | 23.7±12.5  | 0.49 |
| Log milk insulin, µIU/mL                           | 3.2±0.7    | 3.7±0.8   | 0.15             | 2.9±0.9    | 3.2±0.8    | 0.37 |
| Log milk C-reactive protein, ng/mL                 | 4.4±1.2    | 4.8±0.7   | 0.60             | 5.9±1.5    | 5.9±1.1    | 0.93 |
| Log milk Interleukin-6, pg/mL                      | 1.7±1.4    | 3.3±1.7   | <b>0.04</b>      | 1.5±1.7    | 2.4±1.8    | 0.20 |
| Log milk leptin, pg/mL                             | 6.2±0.7    | 8.1±0.9   | <b>&lt;0.001</b> | 6.4±0.9    | 6.2±1.4    | 0.62 |
| Log milk adiponectin, ng/mL                        | 3.0±0.4    | 4.2±1.0   | <b>&lt;0.001</b> | 2.9±0.37   | 3.0±0.5    | 0.35 |

GDM, gestational diabetes mellitus; BMI, body mass index; HEI, healthy eating index

Values are reported as the mean± SD, unless noted as percentage. No. of missing is as follows: maternal age, N=2; ethnicity, N=4; race, N=3; parity, N=5; gestational age at birth, N=3; mode of delivery, N=12; pre-pregnancy BMI, N=2; 1 h 50 g OGCT result, N=7; gestational weight gain, N=6; breast milk volume at 1 month, N=1 and at 3 months, N=1; exclusive breastfeeding at 3 months, N=12; postpartum weight loss at 1 month, N=6 and at 3 months, N=5; postpartum BMI at 1 month, N=3 and 3 months, N=5; HEI at 1 month, N=10 and at 3 months, N=10.

<sup>a</sup> Evaluated with chi-square tests for categorical variables and t-test for continuous variables.
